# Supplementary material for: CD138<sup>-</sup> multiple myeloma cells express high level of CHK1 which correlated to overall survival in MM patient
Source: publisher site journal article supplement (doi:10.18632/aging.104066), 2020-11-10
Supplement: Supplementary file [file aging-v12i22-104066-supplementary-material-SD1.pdf]

## SUPPLEMENTARY TABLES

**Supplementary Table 1. DEGs analysis result.**

| NO.  | genesymbol | ID      | logFC      | AveExpr    | t          | P.Value    | adj.P.Val  | B          |
|------|------------|---------|------------|------------|------------|------------|------------|------------|
| 2660 | CDC7       | 7902913 | 1.20992275 | 5.37396213 | 2.78602574 | 0.02154565 | 0.1726192  | -3.2848305 |
| 2701 | CDK1       | 7927710 | 1.1229915  | 6.12909975 | 2.94803956 | 0.01658302 | 0.16063097 | -3.0362356 |
| 2965 | CHEK1      | 7945014 | 1.25384825 | 8.16880263 | 4.37013511 | 0.0018745  | 0.09430518 | -0.9544463 |

**Supplementary Table 2. Kegg pathway.**

| Term                                                           | Count | PValue      | Genes                                                                                                                                                                                | Fold Enrichment | Bonferroni  | Benjamini   | FDR         |
|----------------------------------------------------------------|-------|-------------|--------------------------------------------------------------------------------------------------------------------------------------------------------------------------------------|-----------------|-------------|-------------|-------------|
| hsa04110:Cell cycle                                            | 27    | 1.01E-06    | YWHAZ, E2F5, ANAPC13, PRKDC, ANAPC10, CHEK1, CDC16, CCNE2, RAD21, STAG2, CDC7, CDC6, CDK1, RBL2, ANAPC4, RBL1, YWHAB, SMAD4, CDC23, CDK6, SMAD2, RB1, ATM, SMC3, MCM6, HDAC2, MAD2L1 | 2.898047493     | 1.71E-04    | 1.71E-04    | 0.001229924 |
| hsa03050:Proteasome                                            | 13    | 1.15E-04    | PSMA2, PSMA1, PSMC6, PSMD14, PSMB1, PSMD12, PSMA5, PSMA4, PSMC2, PSMA3, PSMD1, POMP, PSMD6                                                                                           | 3.711053725     | 0.019301519 | 0.009697783 | 0.139771344 |
| hsa04114:Oocyte meiosis                                        | 21    | 1.38E-04    | CDK1, YWHAZ, ANAPC13, ANAPC4, YWHAB, PPP3R1, CDC23, ANAPC10, CDC16, PPP1CC, PPP1CB, SMC3, CCNE2, MAPK1, MAD2L1, SLK, PPP2CA, PPP2CB, PPP3CB, FBXO5, PPP3CA                           | 2.561405613     | 0.023147852 | 0.007776264 | 0.167929275 |
| hsa04120:Ubiquitin mediated proteolysis                        | 24    | 1.57E-04    | XIAP, UBE3A, ANAPC13, VHL, UBE2G1, ANAPC4, CDC23, UBA6, HERC4, ANAPC10, CDC16, UBE2H, BIRC2, CUL3, CUL2, CUL5, FBXW7, UBE2K, UBA2, UBA3, UBE2W, RCHY1, UBE2D1, TRIP12                | 2.350403482     | 0.026260353 | 0.006630747 | 0.190790462 |
| hsa03018:RNA degradation                                       | 14    | 2.07E-04    | DIS3, PAPOLA, EXOSC8, CNOT8, CNOT6L, LSM5, CNOT2, LSM3, CNOT7, MPHOSPH6, LSM1, HSPA9, C1D, DDX6                                                                                      | 3.295375642     | 0.034576002 | 0.007012874 | 0.252202896 |
| hsa03022:Basal transcription factors                           | 10    | 7.81E-04    | TAF11, TAF2, TAF13, GTF2A1, GTF2A2, TAF9B, GTF2H3, GTF2B, TBPL1, GTF2H1                                                                                                              | 3.833396155     | 0.124452204 | 0.021907392 | 0.949245571 |
| hsa00563:Glycosylphosphatidylinositol(GPI)-anchor biosynthesis | 7     | 0.00853127  | PIGK, PIGF, PIGY, PIGX, PIGW, PIGB, PIGN                                                                                                                                             | 3.756728232     | 0.766958304 | 0.187855372 | 9.92491482  |
| hsa00520:Amino sugar and nucleotide sugar metabolism           | 9     | 0.014340569 | PGM2, PGM3, GNPDA2, GFPT1, GNPAT1, HEXB, UGDH, FPGT, UGP2                                                                                                                            | 2.744363157     | 0.914183677 | 0.264307654 | 16.15657625 |
| hsa00510:N-Glycan biosynthesis                                 | 9     | 0.018550464 | STT3B, MAN1A2, ALG10B, DPM1, ALG5, ALG6, MAN1A1, ALG11, ALG8                                                                                                                         | 2.625043019     | 0.958547035 | 0.297906315 | 20.42243587 |
| hsa04914:Progesterone-mediated oocyte maturation               | 13    | 0.024178803 | CDK1, GNAI3, PIK3CB, ANAPC13, ANAPC4, CDC23, ANAPC10, CDC16, PPP1CB, MAPK1, MAD2L1, MAPK14, MAPK9                                                                                    | 2.028134012     | 0.984406552 | 0.340379394 | 25.81453929 |

|                                                                     |    |             |                                                                                             |             |             |             |             |
|---------------------------------------------------------------------|----|-------------|---------------------------------------------------------------------------------------------|-------------|-------------|-------------|-------------|
| hsa00620:Pyruvate metabolism                                        | 8  | 0.026081166 | ME1, LDHB, ME2, PDHA1, DLAT, ACAT1, ALDH9A1, MDH1                                           | 2.683377309 | 0.988808972 | 0.335301738 | 27.55979969 |
| hsa04210:Apoptosis                                                  | 13 | 0.026240681 | CFLAR, XIAP, PIK3CB, PPP3R1, BIRC2, ATM, IRAK4, CASP6, CASP3, PRKAR1A, PPP3CB, PPP3CA, CHUK | 2.004822127 | 0.989116299 | 0.313883203 | 27.70441471 |
| hsa05120:Epithelial cell signaling in Helicobacter pylori infection | 11 | 0.027367152 | ATP6V1C1, ATP6V1A, CASP3, ADAM10, LYN, MAPK14, MAP2K4, MAPK9, ATP6V1B2, ATP6V1D, CHUK       | 2.170378706 | 0.991060391 | 0.304320642 | 28.71814593 |
| hsa00970:Aminoacyl-tRNA biosynthesis                                | 8  | 0.029517008 | TARS, NARS, DARS, RARS, NARS2, GARS, SEPSECS, FARSB                                         | 2.617929082 | 0.993863117 | 0.304981642 | 30.61670827 |
| hsa00270:Cysteine and methionine metabolism                         | 7  | 0.036878177 | LDHB, CTH, MTAP, AHCYL1, MAT2B, ENOPH1, AMD1                                                | 2.762300171 | 0.99831807  | 0.346788431 | 36.77138752 |
| hsa05014:Amyotrophic lateral sclerosis (ALS)                        | 9  | 0.040165789 | CASP3, DERL1, MAPK14, RAB5A, PPP3CB, PPP3R1, PPP3CA, CAT, SOD1                              | 2.278339224 | 0.999059501 | 0.353103365 | 39.35473238 |
| hsa00280:Valine, leucine and isoleucine degradation                 | 8  | 0.041615194 | ACADSB, ACADM, OXCT1, ACAT1, HIBADH, PCCA, ALDH9A1, HADHB                                   | 2.439433917 | 0.999272578 | 0.346268819 | 40.46256723 |
| hsa04140:Regulation of autophagy                                    | 7  | 0.041831221 | GABARAPL2, ATG4C, ATG5, BECN1, ATG4A, PRKAA1, ATG3                                          | 2.683377309 | 0.999299928 | 0.332071236 | 40.62608511 |
| hsa04130:SNARE interactions in vesicular transport                  | 7  | 0.059109694 | VAMP7, STX16, BET1, VTI1B, VAMP3, GOSR1, SNAP23                                             | 2.471531732 | 0.999968258 | 0.420246165 | 52.44675687 |
| hsa04720:Long-term potentiation                                     | 10 | 0.062803114 | MAPK1, NRAS, PPP3CB, PPP3R1, PPP1R12A, RAPIA, RAPIB, PPP3CA, PPP1CC, PPP1CB                 | 1.973071551 | 0.999983735 | 0.423814781 | 54.67467678 |
| hsa00071:Fatty acid metabolism                                      | 7  | 0.072677468 | ACADSB, ACADM, ACSL4, ACSL3, ACAT1, ALDH9A1, HADHB                                          | 2.347955145 | 0.999997313 | 0.457092772 | 60.16898459 |
| hsa00640:Propanoate metabolism                                      | 6  | 0.084727655 | LDHB, ACADM, SUCLG2, ACAT1, PCCA, ALDH9A1                                                   | 2.515666227 | 0.999999709 | 0.49546768  | 66.0436841  |
| hsa00900:Terpenoid backbone biosynthesis                            | 4  | 0.095124864 | HMGCR, IDI1, ACAT1, PDSS2                                                                   | 3.577836412 | 0.999999958 | 0.522323875 | 70.46147324 |
